# Supplementary material for: Correction: Edesign: Primer and Enhanced Internal Probe Design Tool for Quantitative PCR Experiments and Genotyping Assays
Source: PubMed Central journal article supplement (PMC4807007; doi:10.1371/journal.pone.0152713), 2016-03-24
Supplement: pone.0152713.s001.pdf [file pone.0152713.s001.pdf]

# S1 Table. New Functions in Edesign.

| Category                                                                        | New Function                                                                                                                                                                  | Name in Web interface                                                                                                                                                                                                                                                                                                                                                                                                                          | Description                                                                                                                                                                                                                                                                                                     | modified CORE programs                                                                                |
|---------------------------------------------------------------------------------|-------------------------------------------------------------------------------------------------------------------------------------------------------------------------------|------------------------------------------------------------------------------------------------------------------------------------------------------------------------------------------------------------------------------------------------------------------------------------------------------------------------------------------------------------------------------------------------------------------------------------------------|-----------------------------------------------------------------------------------------------------------------------------------------------------------------------------------------------------------------------------------------------------------------------------------------------------------------|-------------------------------------------------------------------------------------------------------|
| Enhanced internal probe design                                                  | Internal probe design on any direction                                                                                                                                        | Internal Probe Direction                                                                                                                                                                                                                                                                                                                                                                                                                       | Strand of internal probe can be selected from "Forward", "Reverse", "Any". "Any" will list candidate internal probe from both strands. When a user specifies own probe sequence, the user must specify "Forward" or Reverse".                                                                                   | read_boulder_Z.c<br>libprimer3_Z.h<br>libprimer3_Z.c<br>format_output_Z.c                             |
|                                                                                 | Multiple Internal probe selection                                                                                                                                             | -                                                                                                                                                                                                                                                                                                                                                                                                                                              | Primer3 returns only one best internal probe for each of primer pair. Upgraded Edesign selection procedure returns multiple internal probes if their scores are high.                                                                                                                                           | libprimer3_Z.h<br>libprimer3_Z.c                                                                      |
|                                                                                 | Internal probe mishybridization check                                                                                                                                         | OLD: Internal Probe Max Template Mishyb                                                                                                                                                                                                                                                                                                                                                                                                        | Edesign calculates mishybridization of internal probe in the target sequence (binding to sequences except for intentional binding site). By the cut-off parameter, probes having strong mishybridization site is filtered out. The weighted mishybridization score is add to the total penalty score.           | read_boulder_Z.c<br>libprimer3_Z.h<br>libprimer3_Z.c                                                  |
|                                                                                 |                                                                                                                                                                               | TH: Internal Probe Template Mishyb                                                                                                                                                                                                                                                                                                                                                                                                             |                                                                                                                                                                                                                                                                                                                 |                                                                                                       |
|                                                                                 | Primer-internal probe complementarity check                                                                                                                                   | OLD: Pair Max Any Complementarity                                                                                                                                                                                                                                                                                                                                                                                                              | Edesign includes complementarity check of primers bound to internal probe in "Pair Complementarity" check. The cut-off parameters are independently applied to each of left primer-probe, right primer-probe and primer pair. The weighted complementarity scores are added to the total penalty score.         | libprimer3_Z.h<br>libprimer3_Z.c<br>format_output_Z.c                                                 |
| OLD: Pair Max 3' Complementarity                                                |                                                                                                                                                                               |                                                                                                                                                                                                                                                                                                                                                                                                                                                |                                                                                                                                                                                                                                                                                                                 |                                                                                                       |
| TH: Pair Max Any Complementarity<br>TH: Pair Max 3' Complementarity             |                                                                                                                                                                               |                                                                                                                                                                                                                                                                                                                                                                                                                                                |                                                                                                                                                                                                                                                                                                                 |                                                                                                       |
| Genotyping mode                                                                 | Genotyping mode ON/OFF                                                                                                                                                        | Genotyping by Internal Probe                                                                                                                                                                                                                                                                                                                                                                                                                   | If this is checked, Edesign will attempt to prick internal probe to detect the target variant. Internal probe site is restricted to overlap the target variant. Target variant in the target sequence must be specified using "[", "]" and "/". Different variants are separated by "/".                        | primer3_boulder_main_Z.c<br>read_boulder_Z.c<br>libprimer3_Z.h<br>libprimer3_Z.c<br>format_output_Z.c |
|                                                                                 | Setting for T <sub>M</sub> against target variant<br>(In the genotyping mode, Edesign calculates the melting temperatures of internal probes against Target Variant sequence) | Internal Probe Tm Difference by Target Variant                                                                                                                                                                                                                                                                                                                                                                                                 | Penalty weight for the difference of the T <sub>M</sub> values of an internal probe caused by the target variant. Larger the difference, it is easier to discriminate a mismatch case from a perfect match case. If this weight is larger than 0, higher penalty is given to smaller T <sub>M</sub> difference. | read_boulder_Z.c<br>libprimer3_Z.h<br>libprimer3_Z.c                                                  |
|                                                                                 |                                                                                                                                                                               | Internal Probe Tm Min for Target Variant                                                                                                                                                                                                                                                                                                                                                                                                       | Edesign will NOT pick internal probes whose T <sub>M</sub> against the target variant are smaller than this parameter.                                                                                                                                                                                          | read_boulder_Z.c<br>libprimer3_Z.h<br>libprimer3_Z.c                                                  |
|                                                                                 | Displaying T <sub>M</sub> for target variant                                                                                                                                  | tm(VAR)                                                                                                                                                                                                                                                                                                                                                                                                                                        | T <sub>M</sub> of the primer or probe against the target variant sequence is displayed in the output.                                                                                                                                                                                                           | libprimer3_Z.h<br>libprimer3_Z.c<br>format_output_Z.c                                                 |
|                                                                                 | Setting for target variant position                                                                                                                                           | Internal Probe Terminal Region Excluded for Target Variant                                                                                                                                                                                                                                                                                                                                                                                     | Length of the 5' and 3' terminal regions of internal probe where the target variant will not be placed. Generally an inner nucleotide is preferable for discriminating the variation.                                                                                                                           | read_boulder_Z.c<br>libprimer3_Z.h<br>libprimer3_Z.c                                                  |
| Treating modified oligonucleotides<br><br>Modification (ECHO)-specific features | Internal probe modification ON/OFF                                                                                                                                            | Set Internal Probe as Eprobe                                                                                                                                                                                                                                                                                                                                                                                                                   |                                                                                                                                                                                                                                                                                                                 | read_boulder_Z.c<br>libprimer3_Z.h<br>libprimer3_Z.c                                                  |
|                                                                                 | Left primer modification ON/OFF                                                                                                                                               | Set Left primer as Eprimer                                                                                                                                                                                                                                                                                                                                                                                                                     | If this is checked, Edesign will conduct design of primers and probes with modified nucleotide "Z".                                                                                                                                                                                                             | libprimer3_Z.c<br>format_output_Z.c<br>print_boulder_Z.c                                              |
|                                                                                 | Rright primer modification ON/OFF                                                                                                                                             | Set Right primer as Eprimer                                                                                                                                                                                                                                                                                                                                                                                                                    |                                                                                                                                                                                                                                                                                                                 |                                                                                                       |
|                                                                                 | Set modifiable nucleotide                                                                                                                                                     | -                                                                                                                                                                                                                                                                                                                                                                                                                                              | Modifiable nucleotide ("A", "C", "G" or "T" converted to "Z") can be set for a custom Edesign.                                                                                                                                                                                                                  | modification_Z.h                                                                                      |
|                                                                                 | Calculation of T <sub>M</sub> with modified nucleotide                                                                                                                        | Primer Tm                                                                                                                                                                                                                                                                                                                                                                                                                                      | T <sub>M</sub> of oligomer is calculated with modified-nucleotide thermodynamics (ECHO/DNA thermodynamics).                                                                                                                                                                                                     | oligotm_Z.c                                                                                           |
|                                                                                 |                                                                                                                                                                               | Internal Probe Tm                                                                                                                                                                                                                                                                                                                                                                                                                              |                                                                                                                                                                                                                                                                                                                 |                                                                                                       |
|                                                                                 | Calculation of oligomer complementarity with modified nucleotide                                                                                                              | OLD: Primer Max Template Mispriming                                                                                                                                                                                                                                                                                                                                                                                                            | When "Use Thermodynamic Alignment" is NOT checked (default), these parameters are calculated with scores:<br>match of A or T: 0.8<br>match of G or C: 1.2<br>match of Z (labelled T): 3.0<br>match of N: 0.25<br>mismatch: -1.0                                                                                 | dpal_Z.c                                                                                              |
|                                                                                 |                                                                                                                                                                               | OLD: Pair Max Template Mispriming                                                                                                                                                                                                                                                                                                                                                                                                              |                                                                                                                                                                                                                                                                                                                 |                                                                                                       |
|                                                                                 |                                                                                                                                                                               | OLD: Primer Max Self Complementarity                                                                                                                                                                                                                                                                                                                                                                                                           |                                                                                                                                                                                                                                                                                                                 |                                                                                                       |
|                                                                                 |                                                                                                                                                                               | OLD: Primer Max 3' Self Complementarity                                                                                                                                                                                                                                                                                                                                                                                                        |                                                                                                                                                                                                                                                                                                                 |                                                                                                       |
|                                                                                 |                                                                                                                                                                               | OLD: Pair Max Any Complementarity                                                                                                                                                                                                                                                                                                                                                                                                              |                                                                                                                                                                                                                                                                                                                 |                                                                                                       |
|                                                                                 |                                                                                                                                                                               | OLD: Pair Max 3' Complementarity                                                                                                                                                                                                                                                                                                                                                                                                               |                                                                                                                                                                                                                                                                                                                 |                                                                                                       |
|                                                                                 |                                                                                                                                                                               | OLD: Internal Probe Max Template Mishyb                                                                                                                                                                                                                                                                                                                                                                                                        |                                                                                                                                                                                                                                                                                                                 |                                                                                                       |
|                                                                                 |                                                                                                                                                                               | OLD: Internal Probe Max Self Complementarity                                                                                                                                                                                                                                                                                                                                                                                                   |                                                                                                                                                                                                                                                                                                                 |                                                                                                       |
|                                                                                 |                                                                                                                                                                               | OLD: Internal Probe Max 3' Self Complementarity                                                                                                                                                                                                                                                                                                                                                                                                |                                                                                                                                                                                                                                                                                                                 |                                                                                                       |
| TH: Primer Max Template Mispriming                                              |                                                                                                                                                                               | When "Use Thermodynamic Alignment" is checked, these parameters are calculated with modified-nucleotide thermodynamics (ECHO/DNA thermodynamics).                                                                                                                                                                                                                                                                                              |                                                                                                                                                                                                                                                                                                                 |                                                                                                       |
| TH: Pair Max Template Mispriming                                                |                                                                                                                                                                               |                                                                                                                                                                                                                                                                                                                                                                                                                                                |                                                                                                                                                                                                                                                                                                                 |                                                                                                       |
| TH: Primer Max Self Complementarity                                             |                                                                                                                                                                               |                                                                                                                                                                                                                                                                                                                                                                                                                                                |                                                                                                                                                                                                                                                                                                                 |                                                                                                       |
| TH: Primer Max 3' Self Complementarity                                          |                                                                                                                                                                               |                                                                                                                                                                                                                                                                                                                                                                                                                                                |                                                                                                                                                                                                                                                                                                                 |                                                                                                       |
| TH: Pair Max Any Complementarity                                                |                                                                                                                                                                               |                                                                                                                                                                                                                                                                                                                                                                                                                                                |                                                                                                                                                                                                                                                                                                                 |                                                                                                       |
| TH: Pair Max 3' Complementarity                                                 |                                                                                                                                                                               |                                                                                                                                                                                                                                                                                                                                                                                                                                                |                                                                                                                                                                                                                                                                                                                 |                                                                                                       |
| TH: Internal Probe Max Template Mishyb                                          |                                                                                                                                                                               |                                                                                                                                                                                                                                                                                                                                                                                                                                                |                                                                                                                                                                                                                                                                                                                 |                                                                                                       |
| TH: Internal Probe Max Self Complementarity                                     |                                                                                                                                                                               |                                                                                                                                                                                                                                                                                                                                                                                                                                                |                                                                                                                                                                                                                                                                                                                 |                                                                                                       |
| TH: Internal Probe Max 3' Self Complementarity                                  |                                                                                                                                                                               |                                                                                                                                                                                                                                                                                                                                                                                                                                                |                                                                                                                                                                                                                                                                                                                 |                                                                                                       |
| TH: Primer Max Hairpin                                                          | Hairpin T <sub>M</sub> of oligomer is calculated with modified-nucleotide thermodynamics (ECHO/DNA thermodynamics).                                                           |                                                                                                                                                                                                                                                                                                                                                                                                                                                |                                                                                                                                                                                                                                                                                                                 |                                                                                                       |
| TH: Internal Probe Max Hairpin                                                  |                                                                                                                                                                               |                                                                                                                                                                                                                                                                                                                                                                                                                                                |                                                                                                                                                                                                                                                                                                                 |                                                                                                       |
| Setting for modified nucleotide position                                        | Primer 5' Terminal Region Excluded for Labelling                                                                                                                              | Edesign will examine all possible modification positions other than nucleotides specified by these parameters.<br><br>(Inner nucleotides of Eprimer/Eprobe are preferable to be labelled. Labelling 3' side nucleotides of Eprimer is also preferable since it will be inside after extension by polymerase.)                                                                                                                                  | read_boulder_Z.c<br>libprimer3_Z.h<br>libprimer3_Z.c                                                                                                                                                                                                                                                            |                                                                                                       |
|                                                                                 | Primer 3' Terminal Region Excluded for Labelling                                                                                                                              |                                                                                                                                                                                                                                                                                                                                                                                                                                                |                                                                                                                                                                                                                                                                                                                 |                                                                                                       |
|                                                                                 | Internal Probe 5' Terminal Region Excluded for Labelling                                                                                                                      |                                                                                                                                                                                                                                                                                                                                                                                                                                                |                                                                                                                                                                                                                                                                                                                 |                                                                                                       |
|                                                                                 | Internal Probe 3' Terminal Region Excluded for Labelling                                                                                                                      |                                                                                                                                                                                                                                                                                                                                                                                                                                                |                                                                                                                                                                                                                                                                                                                 |                                                                                                       |
| Labelling Terminal Side                                                         | Penalty weight for modification positions next to the excluded region in case those positions are possible for modification but not a best option.                            | read_boulder_Z.c<br>libprimer3_Z.h<br>libprimer3_Z.c                                                                                                                                                                                                                                                                                                                                                                                           |                                                                                                                                                                                                                                                                                                                 |                                                                                                       |
| Setting for modified nucleotide position for Genotyping                         | Internal Probe Labelling Position against Target Variant                                                                                                                      | If this is NOT checked (default), a modified nucleotide "Z" will be designed far from the target variant more than specified nucleotides (the default is 2: "Z" will be on 3, 4 or further nucleotide from the target variant.).<br><br>If this is CHECKED, the modified nucleotide "Z" is designed near or on the target variant within specified nucleotides (the default is 1: "Z" will be on 0 or 1 nucleotides from the target variant.). | read_boulder_Z.c<br>libprimer3_Z.h<br>libprimer3_Z.c                                                                                                                                                                                                                                                            |                                                                                                       |
